# Supplementary material
Source: Research Square preprint supplement (doi:10.21203/rs.3.rs-9605886/v1)
Supplement: Supplementary file 1 [file 1a35d9ce5f7b9caa9176fafe.docx]

**Supplementary Table 4 Attribute relative importance**
