# Supplementary material
Source: Research Square preprint supplement (doi:10.21203/rs.3.rs-9605886/v1)
Supplement: Supplementary file 2 [file 4c8f90b22923ba4d705bd786.docx]

**Supplementary Table 2 DIRECT checklist for reporting discrete choice experiments in health**

| **Section and item** | **Page and paragraph** |
| --- | --- |
| *Purpose and rationale* | |
| 1. Describe the real-world context and decision-maker that the hypothetical choice context seeks to replicate or inform | Page 6, paragraph 1 |
| 2. Provide a rationale for using a DCE to answer the research question | Page 5, paragraph 2 |
| *Attributes and levelsa* | |
| 3. Describe how attributes and levels were derived (e.g. literature review, interviews, focus groups, expert input) | Page 7, paragraphs 1-2 |
| 4. Provide the final list of attributes and levels | Supplementary Table 1 |
| *Experimental design* | |
| 5. Report the number of alternatives per choice set and whether they were labelled or unlabelled | Page 8, paragraph 2, page 9 paragraph 1 |
| 6. Describe response options (e.g. forced choice, opt-out, status quo) | Page 9, paragraph 1 |
| 7. Describe the type of experimental design (e.g. orthogonal, D-efficient, Bayesian efficient, partial profile) | Page 9, paragraph 1 |
| 8. Describe which effects are identified in the design (e.g. main effects, higher order interactions, functional form) | Page 10, paragraph 3 |
| 9. Describe the number of choice sets, blocks and choice sets per block | Page 9, paragraph 1 |
| 10. Indicate how the experimental design was obtained (software, catalogue, other) | Page 9, paragraph 1 |
| *Survey design* | |
| 11. Provide a sample choice set and the instructions and background information given to respondents (e.g. providing the survey as an appendix) | Page 7, paragraph 1, page 8, Figure 1 |
| 12. Report any randomisation (e.g. choice set order, attribute order, alternative order, framing effects) | Page 9, paragraph 1 |
| 13. Describe what was checked in piloting (e.g. understanding, respondent burden, timing, wording) | Page 9, paragraph 2 |
| 14. Report whether information from the pilot was used to update the experimental design (e.g. priors, functional form of attributes) or survey design | Page 9, paragraph 2 |
| *Sample and data collection* | |
| 15. Report respondent inclusion/exclusion criteria | Page 6, paragraph 2 |
| 16. Describe how data were collected (e.g. mail, personal interview, web survey) | Page 6, paragraph 2 |
| 17. Report the response rate or cooperation rate, if possible | Page 12, paragraph 2 |
| 18. Report the final sample size and how the sample size was determined | Page 12, paragraph 1 |
| 19. Describe respondent characteristics and representativeness of target population, if known | Page 12, paragraph 2 |
| **Section and item** | **Page and paragraph** |
| *Econometric analysis* | |
| 20. Indicate coding of data (e.g. effects, dummy, continuous) including definitions | Page 10, paragraph 3 |
| 21. Report whether any respondents were removed and why (e.g. suspected fraudulent responses, rationality tests) | Page 12, paragraph 1 |
| 22. Provide the rationale for model choice (e.g. conditional logit, mixed logit, latent class) and assumptions (e.g. error variance) | Page 10, paragraph 2 |
| 23. Report model specification | Page 10, paragraph 2 |
| *Reporting of results* | |
| 24. Report the model performance, goodness of fit (if comparing models) | MMNL Table 2  WTP Table 3 |
| 25. Describe methods used for analysis of model results (e.g. calculation of marginal rate of substitution, attribute relative importance, welfare gain) | Page 11, paragraphs 3-4 |
| 26. Report measures of precision for the output(s) of interest (e.g. confidence intervals) and how these were derived | Page 10, paragraph 3, page 11, paragraphs 2-3 |

a For reporting of formative qualitative analysis, see https://www.equator-network.org/reporting-guidelines/using-qualitative-methods-for-attribute-development-for-discrete-choice-experiments-issues-and-recommendations
