# Supplementary material
Source: Research Square preprint supplement (doi:10.21203/rs.3.rs-9605886/v1)
Supplement: Supplementary file 3 [file 5173c1c7a261fd592a10a446.docx]

| **Variable** | **Coefficient (95% CI) p-value** | | | | | | | |
| --- | --- | --- | --- | --- | --- | --- | --- | --- |
| **People with cancer n=206** | **Metropolitan location (MM1) n=146** | **Non-metropolitan**  **location (MM2-5) n=59** | **Aged 21-49 years n=44** | **Aged 50-65 years n=104** | **Aged 66+ years n=56** | **Female**  **n=161** | **Male**  **n=42** | |
| **Follow up call (base value no call)** | | | | | | | | |
| Call at 1 week | 0.350 (0.116-0.583) **0.003#** | 0.439 (0.149-0.729) **0.003#** | 0.147 (-0.252- 0.545) 0.471 | 0.394 (-0.162-0.950) 0.165 | 0.449 (0.078-0.819) 0.018^ | 0.186 (-0.246-0.617) 0.400 | 0.242 (-0.009- 0.493) 0.059 | 0.947 (0.006-1.889) 0.049^ | |
| Call at 2 weeks | 0.186 (-0.052-0.425) 0.126 | 0.280 (-0.012-0.573) 0.060 | 0.032 (-0.375-0.438) 0.879 | 0.227 (-0.292-0.747) 0.391 | 0.266 (-0.108-0.640) 0.163 | 0.139 (-0.322-0.600) 0.554 | 0.182 (-0.075-0.438) 0.165 | 0.206 (-0.635-1.046) 0.632 | |
| **Operating hours (base value Mon-Fri 7am-5 pm)** | | | | | | | | |
| Mon-Fri 9 am-5 pm +  Sat-Sun 9 am-12 midday | 0.487 (0.204-0.771) **0.001#** | 0.552 (0.208-0.896) **0.001#** | 0.440 (-0.058-0.939) 0.083 | 0.282 ( -0.371-0.935) 0.398 | 0.606 (0.123-1.089) 0.014^ | 0.459 (0.026- 0.892) 0.038^ | 0.471 (0.181- 0.762) **0.002#** | 0.921 (-0.331-2.173) 0.150 | |
| Mon-Fri 9 am-9 pm | 0.284 (0.039-0.529, 0.023^ | 0.333 (0.036- 0.629) 0.028^ | 0.199 (-0.225- 0.624) 0.357 | 0.022 (-0.547-0.592) 0.939 | 0.335 (-0.043-0.714) 0.082 | 0.431 (-0.072-0.933) 0.093 | 0.326 (0.048- 0.604) 0.021^ | 0.070 (-0.752-0.892) 0.868 | |
| **Other ways to contact to the service (base value none)** | | | | | | | | |
| Online messaging with a person responding in 1 day | 0.280 (0.041-0.519) 0.022^ | 0.206 (-0.084-0.497) 0.164 | 0.495 (0.065-  0.924) 0.024^ | 0.652 (0.104-1.200) 0.020^ | 0.190 (-0.187-0.566) 0.324 | 0.124 (-0.316-0.564) 0.580 | 0.313 (0.058- 0.568) 0.016^ | 0.238 (-0.625- 1.100) 0.589 | |
| Video calls | 0.113 (-0.123-0.349) 0.347 | 0.060 (-0.218-0.339) 0.671 | 0.306 (-0.138-0.750) 0.177 | 0.111 (-0.419-0.641) 0.682 | 0.118 (-0.251-0.487) 0.530 | -0.048 (-0.492-0.395) 0.831 | 0.100 (-0.153-0.353) 0.440 | 0.191 (-0.621-1.003) 0.645 | |
| **Experience of the person answering your call (base value cancer nurse)** | | | | | | | | |
| Administrative person who answers and directs your call | -0.656 (-0.925 to  -0.387) **0.000#** | -0.613 (-0.926 to  -0.299) **0.000#** | -0.730 (-1.235 to  -0.225) **0.005#** | -0.181 (-0.711- 0.350) 0.505 | -0.612 (-1.035 to-0.189) **0.005#** | -1.152 (-1.698 to  -0.606) **0.000#** | -0.570 (-0.845 to  -0.296) **0.000#** | -1.110 (-2.251-0.030) 0.056 | |
| A person with personal cancer experience | -0.751 (-1.038 to  -0.465) **0.000#** | -0.816 (-1.183 to-0.449) **0.000#** | -0.573 (-0.990 to  -0.155) **0.007#** | -0.605 (-1.234  -0.023) 0.059 | -0.702 (-1.148 to-0.256) **0.002#** | -1.097 (-1.710 to  -0.485) **0.000#** | -0.720 (-1.012 to  -0.428) **0.000#** | -1.131 (-2.224 to  -0.037) 0.043^ | |
| **Consistency of the person who assists you (base value different person on all calls)** | | | | | | | | |
| Same person on SOME calls | 0.838 (0.564 -1.112) **0.000#** | 0.940 (0.594-1.287) **0.000#** | 0.622 (0.192- 1.052) **0.005#** | 0.749 (0.140-1.358) 0.016^ | 0.955 (0.507- 1.403) **0.000#** | 0.971 (0.457-1.485) **0.000#** | 0.807 (0.523-1.091) **0.000#** | 1.143 (0.125-2.160) 0.028^ | |
| Same person on EVERY call | 1.003 (0.697- 1.309) **0.000#** | 1.090 (0.714- 1.467) **0.000#** | 0.806 (0.277- 1.335) **0.003#** | 1.115 (0.454- 1.777) **0.001#** | 1.044 (0.532-1.557) **0.000#** | 1.038 (0.492-1.584) **0.000#** | 0.975 (0.657-1.293) **0.000#** | 1.588 (0.218-2.958) 0.023^ | |
| **Call length** | 0.002 (-0.001-0.005) 0.140 | 0.002 (-0.001-0.006) 0.192 | 0.001 (-0.004-  0.006) 0.680 | 0.002 (-0.005-0.009) 0.654 | 0.004 (-0.001-0.009) 0.091 | -0.002 (-0.007-0.004) 0.528 | 0.002 (-0.001-0.005) 0.265 | 0.005 (-0.007-0.016) 0.402 | |
| **Cost of service AU$** | -0.043 (-0.052 to-0.033) **0.000#** | -0.044 (-0.056 to  -0.033) **0.000#** | -0.038 (-0.053 to  -0.022) **0.000#** | -0.044 (-0.064 to  -0.024) **0.000#** | -0.052 (-0.069 to-0.035) **0.000#** | -0.032 (-0.045 to  -0.019) **0.000#** | -0.039 (-0.048 to  -0.030) **0.000#** | -0.073 (-0.125 to  -0.021) **0.006#** | |

10,000 draws

AU=Australian; CI=confidence interval; Fri=Friday; MMNL=mixed multinomial model; MM=Modified Monash; Mon=Monday; Sat=Saturday; Sun=Sunday.

Footnote: For location, age and gender subgroups, some data was either missing or incorrectly reported, i.e., an incorrect postcode

**#**Significant at 1% level, p≤0.01 ^ Significant at 5% level, p≤0.05
