# Supplementary material
Source: Research Square preprint supplement (doi:10.21203/rs.3.rs-9605886/v1)
Supplement: Supplementary file 4 [file 54e4e13edca8b48e934c9e61.docx]

Admin=Administrative; CI=confidence intervals; Fri=Friday; Mon=Monday; Sat=Saturday; Sun=Sunday.

95% CI
