# Supplementary material
Source: Research Square preprint supplement (doi:10.21203/rs.3.rs-9605886/v1)
Supplement: Supplementary file 5 [file 7a2d347bee96a64e72d28e39.docx]

**Supplementary** **Table 1 DCE attributes and attribute levels**

| **Attributes** | **Level 1** | **Level 2** | **Level 3** |
| --- | --- | --- | --- |
| 1. Follow up call | None | Yes, within 1 week | Yes, within 2 weeks |
| 1. Operating hours   *Current hours Monday-Friday, 9 am - 5 pm* | Monday - Friday **7 am - 5 pm** | Monday - Friday **9 am - 9 pm** | Monday - Friday **9 am - 5 pm** **AND**  Saturday and Sunday **9 am - 12 midday** |
| 1. Other ways to contact to the service | None | Online messaging function with a person responding within 1 day | Video calls  (e.g. Zoom or Microsoft Teams) |
| 1. Experience of the person answering your call | An administrative person who answers and directs your call | A person with personal experience of cancer | A cancer nurse |
| 1. Consistency of the person who assists you | You talk to a **DIFFERENT** person on **EVERY** call | You talk to the **SAME** person  on **SOME** calls | You talk to the **SAME** person  on **EVERY** call |
| 1. Call length | Up to **30** minutes | Up to **60** minutes | Unlimited |
| 1. Cost of service | AU$0 | AU$20 (US$14) | AU$50 (US$35) |

AU=Australia; US=United States
