# Supplementary material
Source: Research Square preprint supplement (doi:10.21203/rs.3.rs-9605886/v1)
Supplement: Supplementary file 6 [file be036ae76271695205dbc326.pdf]

## Study 8 DCE Survey

---

### Start of Block: Eligibility

First let's check if you are eligible by completing a few quick questions below.

If you are eligible, detailed information is in the participant information statement on the consent form that will come up on the next page.

**Q2 Are you aged 18 years or older?**

Yes (1)

No (0)

**Q4 Do you live in Victoria, Australia?**

Yes (1)

No (0)

**Q3 In the last 12 months, have you used Cancer Council Victoria's telephone cancer information and support service, 13 11 20?**

Yes (1)

No (0)

**Q4** Thinking about your **recent 13 11 20 call**, was your **main reason** for calling, as

A person diagnosed with cancer or a cancer survivor (1)

A carer or supporter of someone diagnosed with cancer (2)

Neither (3)

---

### Start of Block: Consent

**Q5 Participant Information Sheet**

<<Logo CCV and Deakin Uni>>

**An online survey of users of Cancer Council Victoria's telephone information and support service (13 11 20) and their preferences about the service**

As someone who has recently used Cancer Council Victoria's telephone cancer information and support services (13 11 20), you are being asked to participate in this research study about your

preferences for the service. This study uses a **scenario-based online survey** to see which service features are important to users and understand how valuable this service is.

- This work is **part of a larger project** looking at the value of telephone cancer information and support services.

Dr Ann Livingstone of Deakin University is conducting the study with Cancer Council Victoria.

- **Participation** in this study is **voluntary**.
- If you agree to participate, you will complete a **single online survey** asking questions about you and your preferences for different 13 11 20 service features.
- The questions will take approximately **20 minutes**.

### What's in the survey?

Firstly, we'll show you some questions about what features of 13 11 20 important to you. These questions are about **existing or hypothetical (may not currently exist) features of the service**.

For each question, you choose the response you prefer from the three options provided.

You will then see seven scenarios, each with two hypothetical services, '**Service 1**' and '**Service 2**'.

- For each scenario, please select which service you prefer.
- The survey will start with an example =.
- Each scenario is unique, though some appear similar. Please read through each scenario carefully before making your decision.
- In each scenario, the dollar amount expressed is a measure of the importance of this service. After completing your seven scenarios, you will then complete a few questions about yourself (age, gender, health information, etc.)

**The participant information statement tells you more about the research study and can be read using this link: <<Link to pdf of full [Participant Information Sheet](#)>>**

**If you agree to participate, please click the 'Next page' button to begin.**

---

### Start of Block: Future contact

Q8 **Optional** - (select 'no' to stay anonymous)

I agree to being contacted in the future for invitation in other studies as part of this project or other cancer research.

Yes (1)

No (0)

*Display This Question:*

*If future\_contact = Yes*

Q117 Email address

---

## **Start of Block: DCE instructions**

### **Introduction to the choice survey:**

As someone who used the Cancer Council Victoria's telephone cancer information and support service (13 11 20), you are being asked **what features are important for this service**. Your valuable opinions will help us understand what is most useful to callers to the 13 11 20 service.

Firstly, we will show you some questions to start you thinking about what features are important to you when using 13 11 20.. These questions are about **existing or hypothetical (may not currently exist) features of the service**.

For each question, please choose the response from the three options provided.

## Questions about features of 13 11 20

The Cancer Council Victoria's telephone cancer information and support service (13 11 20) is **free** and operates **Monday-Friday, 9 am-5 pm**.

The **dollar amount** expressed in the **hypothetical question** below is a **measure of the importance of this service**.

Please read through each service feature questions (1-7) about 13 11 20 carefully and select **one response per question**.

| Question                                                                                                  | Response                                                                                                                                     |                                                                                                 |                                                                                                                             |
|-----------------------------------------------------------------------------------------------------------|----------------------------------------------------------------------------------------------------------------------------------------------|-------------------------------------------------------------------------------------------------|-----------------------------------------------------------------------------------------------------------------------------|
| <b>Would you like to receive a follow-up call?</b>                                                        | No<br><br><input type="checkbox"/>                                                                                                           | Yes, within 1 week<br><br><input type="checkbox"/>                                              | Yes, within 2 weeks<br><br><input type="checkbox"/>                                                                         |
| <b>What would you prefer if service hours were extended?</b><br><br><i>Current hours Mon-Fri, 9am-5pm</i> | Monday - Friday<br><b>7 am - 5 pm</b><br><br><input type="checkbox"/>                                                                        | Monday - Friday<br><b>9 am - 9 pm</b><br><br><input type="checkbox"/>                           | Monday - Friday<br><b>9 am - 5 pm AND</b><br>Saturday and Sunday<br><b>9 am - 12 midday</b><br><br><input type="checkbox"/> |
| <b>What other technology would you like when contacting the service?</b>                                  | None<br><br><input type="checkbox"/>                                                                                                         | Online messaging function with a person responding within 1 day<br><br><input type="checkbox"/> | Video calls (e.g. Zoom/Microsoft Teams)<br><br><input type="checkbox"/>                                                     |
| <b>What type of experience would you prefer for the person answering your call?</b>                       | An administrative person who refers your call to the relevant person (e.g. a cancer nurse, financial expert)<br><br><input type="checkbox"/> | Someone with personal experience of cancer<br><br><input type="checkbox"/>                      | A cancer nurse<br><br><input type="checkbox"/>                                                                              |
| <b>Do you prefer the same or a different person to assist you?</b>                                        | You talk to a <b>DIFFERENT</b> person on <b>EVERY</b> call<br><br><input type="checkbox"/>                                                   | You talk to the <b>SAME</b> person on <b>SOME</b> calls<br><br><input type="checkbox"/>         | You talk to the <b>SAME</b> person on <b>EVERY</b> call<br><br><input type="checkbox"/>                                     |
| <b>How long should your call last?</b>                                                                    | Up to <b>30</b> minutes<br><br><input type="checkbox"/>                                                                                      | Up to <b>60</b> minutes<br><br><input type="checkbox"/>                                         | Unlimited<br><br><input type="checkbox"/>                                                                                   |
| <b>How much would you be prepared to pay for the service?</b>                                             | \$0<br><br><input type="checkbox"/>                                                                                                          | \$20<br><br><input type="checkbox"/>                                                            | \$50<br><br><input type="checkbox"/>                                                                                        |

Next:

- We present you with **seven** choices between two **hypothetical** services, '**Service 1**' and '**Service 2**'
- Each service option contains seven factors that users of 13 11 20 have said they value when considering service features.
- For **each scenario**, please **select the service you prefer**.
- Each scenario is unique, though some may appear similar. Please read through each scenario carefully before making your decision.
- After completing the seven scenarios, you will then complete a few questions about yourself (age, gender, health information, etc.)
- First, we will show you an **example question**.

## EXAMPLE SCENARIO

You will now see seven scenarios displaying features of the service that **may or may not currently exist** (hypothetical).

The survey starts with an **EXAMPLE** below.

The Cancer Council Victoria's telephone cancer information and support service (13 11 20) is **free** and operates **Monday-Friday, 9 am-5 pm**.

The **dollar amount** expressed in the **hypothetical scenario** below is a **measure of the importance of this service**.

For each **hypothetical** scenario, please review the two service options, '**Service 1**' or '**Service 2**'. Select the service you prefer by **clicking** on the **circle** at the bottom of the table.

| Feature                                                         | Service 1                                                       | Service 2                                                       |
|-----------------------------------------------------------------|-----------------------------------------------------------------|-----------------------------------------------------------------|
| <b>Follow up call</b>                                           | Yes within 1 week                                               | Yes within 1 week                                               |
| <b>Operating hours</b><br><i>Current hours Mon-Fri, 9am-5pm</i> | Monday - Friday<br><b>9 am - 9 pm</b>                           | Monday - Friday<br><b>9 am - 9 pm</b>                           |
| <b>Other ways to contact to the service</b>                     | Online messaging function with a person responding within 1 day | Online messaging function with a person responding within 1 day |
| <b>Experience of the person answering your call</b>             | A person with personal experience of cancer                     | A person with personal experience of cancer                     |
| <b>Consistency of the person who assists you</b>                | You talk to the <b>SAME</b> person on <b>SOME</b> calls         | You talk to the <b>SAME</b> person on <b>SOME</b> calls         |
| <b>Call length</b>                                              | Up to <b>30</b> minutes                                         | Unlimited                                                       |
| <b>Service fee</b>                                              | \$0                                                             | \$50                                                            |
|                                                                 | <input type="checkbox"/>                                        | <input type="checkbox"/>                                        |

## Scenario 1

The Cancer Council Victoria's telephone cancer information and support service (13 11 20) is **free** and operates **Monday-Friday, 9 am-5 pm**.

The **dollar amount** expressed in the **hypothetical scenario** below is a **measure of the importance of this service**.

For each **hypothetical** scenario, please review the two service options, '**Service 1**' or '**Service 2**'. Select the service you prefer by **clicking** on the **circle** at the bottom of the table.

| <b>Feature</b>                                                  | <b>Service 1</b>                                                | <b>Service 2</b>                                                |
|-----------------------------------------------------------------|-----------------------------------------------------------------|-----------------------------------------------------------------|
| <b>Follow up call</b>                                           | Yes within 1 week                                               | Yes within 1 week                                               |
| <b>Operating hours</b><br><i>Current hours Mon-Fri, 9am-5pm</i> | Monday - Friday<br><b>9 am - 9 pm</b>                           | Monday - Friday<br><b>9 am - 9 pm</b>                           |
| <b>Other ways to contact to the service</b>                     | Online messaging function with a person responding within 1 day | Online messaging function with a person responding within 1 day |
| <b>Experience of the person answering your call</b>             | A cancer nurse                                                  | An administrative person who answers and directs your call      |
| <b>Consistency of the person who assists you</b>                | You talk to the <b>SAME</b> person on <b>SOME</b> calls         | You talk to the <b>SAME</b> person on <b>SOME</b> calls         |
| <b>Call length</b>                                              | Up to <b>30</b> minutes                                         | Up to <b>60</b> minutes                                         |
| <b>Cost of service</b>                                          | \$0                                                             | \$20                                                            |
|                                                                 | <input type="checkbox"/>                                        | <input type="checkbox"/>                                        |

## Scenario 2

The Cancer Council Victoria's telephone cancer information and support service (13 11 20) is **free** and operates **Monday-Friday, 9 am-5 pm**.

The **dollar amount** expressed in the **hypothetical scenario** below is a **measure of the importance of this service**.

For each **hypothetical** scenario, please review the two service options, 'Service 1' or 'Service 2'. Select the service you prefer by **clicking** on the **circle** at the bottom of the table.

| <b>Feature</b>                                                  | <b>Service 1</b>                                           | <b>Service 2</b>                                                                            |
|-----------------------------------------------------------------|------------------------------------------------------------|---------------------------------------------------------------------------------------------|
| <b>Follow up call</b>                                           | No                                                         | Yes within 2 weeks                                                                          |
| <b>Operating hours</b><br><i>Current hours Mon-Fri, 9am-5pm</i> | Monday - Friday<br><b>7 am - 5 pm</b>                      | Monday - Friday<br><b>9 am - 5 pm AND</b><br>Saturday and Sunday<br><b>9 am - 12 midday</b> |
| <b>Other ways to contact to the service</b>                     | None                                                       | Video calls<br>(e.g. Zoom or Microsoft Teams)                                               |
| <b>Experience of the person answering your call</b>             | An administrative person who answers and directs your call | A cancer nurse                                                                              |
| <b>Consistency of the person who assists you</b>                | You talk to a <b>DIFFERENT</b> person on <b>EVERY</b> call | You talk to the <b>SAME</b> person on <b>EVERY</b> call                                     |
| <b>Call length</b>                                              | Up to <b>30</b> minutes                                    | Unlimited                                                                                   |
| <b>Cost of service</b>                                          | \$0                                                        | \$50                                                                                        |
|                                                                 | <input type="checkbox"/>                                   | <input type="checkbox"/>                                                                    |

### **Scenario 3**

The Cancer Council Victoria's telephone cancer information and support service (13 11 20) is **free** and operates **Monday-Friday, 9 am-5 pm**.

The **dollar amount** expressed in the **hypothetical scenario** below is a **measure of the importance of this service**.

For each **hypothetical** scenario, please review the two service options, 'Service 1' or 'Service 2'. Select the service you prefer by **clicking** on the **circle** at the bottom of the table.

| <b>Feature</b>                                                  | <b>Service 1</b>                                                                            | <b>Service 2</b>                                                |
|-----------------------------------------------------------------|---------------------------------------------------------------------------------------------|-----------------------------------------------------------------|
| <b>Follow up call</b>                                           | Yes within 2 weeks                                                                          | No                                                              |
| <b>Operating hours</b><br><i>Current hours Mon-Fri, 9am-5pm</i> | Monday - Friday<br><b>9 am - 5 pm</b> AND<br>Saturday and Sunday<br><b>9 am - 12 midday</b> | Monday - Friday<br><b>7 am - 5 pm</b>                           |
| <b>Other ways to contact to the service</b>                     | Online messaging function with a person responding within 1 day                             | Online messaging function with a person responding within 1 day |
| <b>Experience of the person answering your call</b>             | A cancer nurse                                                                              | An administrative person who answers and directs your call      |
| <b>Consistency of the person who assists you</b>                | You talk to the <b>SAME</b> person on <b>EVERY</b> call                                     | You talk to a <b>DIFFERENT</b> person on <b>EVERY</b> call      |
| <b>Call length</b>                                              | Unlimited                                                                                   | Up to <b>30</b> minutes                                         |
| <b>Cost of service</b>                                          | \$50                                                                                        | \$0                                                             |
|                                                                 | <input type="checkbox"/>                                                                    | <input type="checkbox"/>                                        |

#### **Scenario 4**

The Cancer Council Victoria's telephone cancer information and support service (13 11 20) is **free** and operates **Monday-Friday, 9 am-5 pm**.

The **dollar amount** expressed in the **hypothetical scenario** below is a **measure of the importance of this service**.

For each **hypothetical** scenario, please review the two service options, '**Service 1**' or '**Service 2**'. Select the service you prefer by **clicking** on the **circle** at the bottom of the table.

| <b>Feature</b>                                                  | <b>Service A</b>                                        | <b>Service B</b>                                                                            |
|-----------------------------------------------------------------|---------------------------------------------------------|---------------------------------------------------------------------------------------------|
| <b>Follow up call</b>                                           | Yes within 2 weeks                                      | No                                                                                          |
| <b>Operating hours</b><br><i>Current hours Mon-Fri, 9am-5pm</i> | Monday - Friday<br><b>7 am - 5 pm</b>                   | Monday - Friday<br><b>9 am - 5 pm</b> AND<br>Saturday and Sunday<br><b>9 am - 12 midday</b> |
| <b>Other ways to contact to the service</b>                     | None                                                    | Video calls<br>(e.g. Zoom or Microsoft Teams)                                               |
| <b>Experience of the person answering your call</b>             | A cancer nurse                                          | An administrative person who answers and directs your call                                  |
| <b>Consistency of the person who assists you</b>                | You talk to the <b>SAME</b> person on <b>EVERY</b> call | You talk to a <b>DIFFERENT</b> person on <b>EVERY</b> call                                  |
| <b>Call length</b>                                              | Unlimited                                               | Up to <b>30</b> minutes                                                                     |
| <b>Cost of service</b>                                          | \$50                                                    | \$0                                                                                         |
|                                                                 | <input type="checkbox"/>                                | <input type="checkbox"/>                                                                    |

**Scenario 5**

The Cancer Council Victoria’s telephone cancer information and support service (13 11 20) is **free** and operates **Monday-Friday, 9 am-5 pm**.

The **dollar amount** expressed in the **hypothetical scenario** below is a **measure of the importance of this service**.

For each **hypothetical** scenario, please review the two service options, '**Service 1**' or '**Service 2**'. Select the service you prefer by **clicking** on the **circle** at the bottom of the table.

| <b>Feature</b>                                                  | <b>Service A</b>                                           | <b>Service B</b>                                                                            |
|-----------------------------------------------------------------|------------------------------------------------------------|---------------------------------------------------------------------------------------------|
| <b>Follow up call</b>                                           | Yes within 2 weeks                                         | No                                                                                          |
| <b>Operating hours</b><br><i>Current hours Mon-Fri, 9am-5pm</i> | Monday - Friday<br><b>7 am - 5 pm</b>                      | Monday - Friday<br><b>9 am - 5 pm</b> AND<br>Saturday and Sunday<br><b>9 am - 12 midday</b> |
| <b>Other ways to contact to the service</b>                     | Video calls<br>(e.g. Zoom or Microsoft Teams)              | None                                                                                        |
| <b>Experience of the person answering your call</b>             | A cancer nurse                                             | An administrative person who answers and directs your call                                  |
| <b>Consistency of the person who assists you</b>                | You talk to a <b>DIFFERENT</b> person on <b>EVERY</b> call | You talk to the <b>SAME</b> person on <b>EVERY</b> call                                     |
| <b>Call length</b>                                              | Up to <b>60</b> minutes                                    | Up to <b>60</b> minutes                                                                     |
| <b>Cost of service</b>                                          | \$0                                                        | \$0                                                                                         |
|                                                                 | <input type="checkbox"/>                                   | <input type="checkbox"/>                                                                    |

## Scenario 6

The Cancer Council Victoria's telephone cancer information and support service (13 11 20) is **free** and operates **Monday-Friday, 9 am-5 pm**.

The **dollar amount** expressed in the **hypothetical scenario** below is a **measure of the importance of this service**.

For each **hypothetical** scenario, please review the two service options, '**Service 1**' or '**Service 2**'. Select the service you prefer by **clicking** on the **circle** at the bottom of the table.

| <b>Feature</b>                                                  | <b>Service A</b>                                           | <b>Service B</b>                                                                            |
|-----------------------------------------------------------------|------------------------------------------------------------|---------------------------------------------------------------------------------------------|
| <b>Follow up call</b>                                           | Yes within 1 week                                          | Yes within 1 week                                                                           |
| <b>Operating hours</b><br><i>Current hours Mon-Fri, 9am-5pm</i> | Monday - Friday<br><b>7 am - 5 pm</b>                      | Monday - Friday<br><b>9 am - 5 pm</b> AND<br>Saturday and Sunday<br><b>9 am - 12 midday</b> |
| <b>Other ways to contact to the service</b>                     | None                                                       | Video calls<br>(e.g. Zoom or Microsoft Teams)                                               |
| <b>Experience of the person answering your call</b>             | An administrative person who answers and directs your call | A cancer nurse                                                                              |
| <b>Consistency of the person who assists you</b>                | You talk to the <b>SAME</b> person on <b>SOME</b> calls    | You talk to the <b>SAME</b> person on <b>SOME</b> calls                                     |
| <b>Call length</b>                                              | Up to <b>60</b> minutes                                    | Unlimited                                                                                   |
| <b>Cost of service</b>                                          | \$0                                                        | \$20                                                                                        |
|                                                                 | <input type="checkbox"/>                                   | <input type="checkbox"/>                                                                    |

## Scenario 7

The Cancer Council Victoria's telephone cancer information and support service (13 11 20) is **free** and operates **Monday-Friday, 9 am-5 pm**.

The **dollar amount** expressed in the **hypothetical scenario** below is a **measure of the importance of this service**.

For each **hypothetical** scenario, please review the two service options, '**Service 1**' or '**Service 2**'. Select the service you prefer by **clicking** on the **circle** at the bottom of the table.

| Feature                                                  | Service A                                                                                   | Service B                                                  |
|----------------------------------------------------------|---------------------------------------------------------------------------------------------|------------------------------------------------------------|
| Follow up call                                           | No                                                                                          | Yes within 2 weeks                                         |
| Operating hours<br><i>Current hours Mon-Fri, 9am-5pm</i> | Monday - Friday<br><b>9 am - 5 pm</b> AND<br>Saturday and Sunday<br><b>9 am - 12 midday</b> | Monday - Friday<br><b>7 am - 5 pm</b>                      |
| Other ways to contact to the service                     | None                                                                                        | Video calls<br>(e.g. Zoom or Microsoft Teams)              |
| Experience of the person answering your call             | A cancer nurse                                                                              | An administrative person who answers and directs your call |
| Consistency of the person who assists you                | You talk to the <b>SAME</b> person on <b>EVERY</b> call                                     | You talk to a <b>DIFFERENT</b> person on <b>EVERY</b> call |
| Call length                                              | Unlimited                                                                                   | Unlimited                                                  |
| Cost of service                                          | \$20                                                                                        | \$20                                                       |
|                                                          | <input type="checkbox"/>                                                                    | <input type="checkbox"/>                                   |

Start of Block: Consistency question

Q27 To prove you are not a robot, from this list of responses, please choose the word "**occasionally**"

- Always (1)
  - Most of the time (2)
  - About half the time (3)
  - Occasionally (4)
  - Never (5)
- 

**Start of Block: Demographics**

**Q9 Background questions:**

**Q10 What is your current age?**

▼ Prefer not to answer (-88) ... 100 (100)

**Q11 What gender do you identify with?**

- Woman (1)
- Man (2)
- Non-binary (3)
- Prefer to self-describe: (4)
- 

Prefer not to answer (-888)

**Q12 Are you of Aboriginal and/or Torres Strait Islander Origin?**

- No (0)
- Yes, Aboriginal (1)
- Yes, Torres Strait Islander (2)
- Yes, both Aboriginal and Torres Strait Islander (3)
- Prefer not to answer (-888)

**Q13 What is your residential postcode?**

---

**Q14 Your Country of birth**

▼ Please select: (-99) ... Zimbabwe (198)

**Q15 What language do you most often speak at home? (responses rearranged. English first and then remainder alphabetical)**

- English (1)
  - Arabic (2)
  - Cantonese (3)
  - Filipino/Tagalog (4)
  - Greek (5)
  - Hindi (6)
  - Italian (7)
  - Mandarin (8)
  - Punjabi (9)
  - Sinhalese (10)
  - Vietnamese (11)
  - Other, please specify (12)
- 
- Prefer not to answer (-888)

**Q16 What is your highest level of education?**

- Year 11 or below (1)
- Year 12 (2)
- Certificate III/IV (3)
- Diploma or Advanced Diploma (4)
- Bachelor degree (5)
- Graduate Certificate or Diploma (6)
- Postgraduate degree (7)
- Other, please specify (8) \_\_\_\_\_
- Prefer not to answer (-888)

**Q17 What is your employment status?**

- Full-time, employed/self-employed (1)
  - Part-time, employed/self-employed (2)
  - Casual, employed/self-employed (3)
  - Unemployed (4)
  - Student (5)
  - Retired (6)
  - Other, please specify (7) \_\_\_\_\_
  - Prefer not to answer (-888)
- 

*Display This Question:*

*If eligibility\_patient\_carer = Ever been diagnosed with cancer*

**Q18 Do you provide care or support** on a voluntarily basis to a family member, friend or other person who needs help due to physical or mental health problems, intellectual or developmental disability, dementia or problems due to ageing?

- Yes (1)
- No (0)
- Prefer not to answer (-888)

**Q19 Marital Status:**

- Single (1)
- Married/De facto (partner) (2)
- Separated or Divorced (3)
- Widowed (4)
- Other, please specify: (5) \_\_\_\_\_
- Prefer not to answer (-888)

**Q20 What is your living situation?**

- Living by myself (1)
- Living with partner/spouse and/or family (2)
- Living with friends (3)
- Other, please specify: (4)

---

Prefer not to answer (-888)

*Display This Question:  
If living\_situation != Living by myself*

**Q21 How many people live in your household, including yourself?**

▼ 2 (2) ... Prefer not to answer (-888)

*Display This Question:  
If household\_members Text Response Is Greater Than or Equal to 2*

**Q22 How many people in your household are younger than 18 years old?**

▼ 0 (0) ... Prefer not to answer (-888)

**Q23 Your best estimate of total household income received by all household members, from all sources including welfare, before taxes and deductions.**

- No Income (1)
- \$1 - \$399 per week (\$1 - \$20,799 per year) (2)
- \$400 - \$799 per week (\$20,800 - \$41,599 per year) (3)
- \$800 - \$1,499 per week (\$41,600 - \$77,999 per year) (4)
- \$1,500 - \$2,499 per week (\$78,000 - \$129,999 per year) (5)
- \$2,500 - \$3,499 per week (\$130,000 - \$181,999 per year) (6)
- More than \$3,500 per week (More than \$182,000 per year) (7)
- Don't know (8)
- Prefer not to answer (-888)

---

**Start of Block: Clinical Information**

**Q24 Clinical Information**

If you are **living with cancer** these questions about you.

If you are a **carer/support person**, these next questions are about the person you care for.

**Q25 Year of cancer diagnosis:**

If more than one diagnosis, please respond about your most recent diagnosis.

▼ Please select: (1) ... 1960 (1960)

*Display This Question:*

*If diagnosis\_year = 2024*

*Or diagnosis\_year = 2023*

**Q26 Month of cancer diagnosis:**

▼ Please select: (0) ... December (12)

**Q27 Location of Primary cancer:**

▼ Prefer not to answer (-888) ... Other (43)

**Q28 What best describes your/their current cancer state at this present time:**

- Active cancer (1)
  - Cancer reoccurrence (2)
  - Advanced cancer/metastatic disease (cancer has spread to other areas/organs) (3)
  - Clear of cancer for less than 2 years (4)
  - Clear of cancer 2-5 years (5)
  - Clear of cancer greater than 5 years (6)
  - Other, please specify: (7)
- 
- Prefer not to answer (-888)
-

Display This Question:

If *current\_cancer* = Active cancer

Or *current\_cancer* = Cancer reoccurrence

Or *current\_cancer* = Advanced cancer/metastatic disease (cancer has spread to other areas/organs)

Or *current\_cancer* = Other, please specify:

**Q29 Stage of cancer:**

Stage 1: Usually means that a cancer is small and contained within the organ it started in. (1)

Stage 2: Usually means that the tumour is larger than in stage 1, but the cancer hasn't started to spread into the surrounding tissues. Sometimes, stage 2 means that cancer cells have spread into lymph nodes close to the tumour. (2)

Stage 3: Usually means the cancer is larger. It may have started to spread into surrounding tissues and there are cancer cells in the lymph nodes nearby (3)

Stage 4: Means the cancer has spread from where it started to another body organ. For example to the liver or lung. This is also called secondary or metastatic cancer. (4)

Not yet know (e.g. still having tests to determine stage) (5)

Don't recall (6)

Other, please specify: (7)

---

Prefer not to answer (-888)

**Q30 Are *you* or the *person you care for* currently having cancer treatment?**

Yes (1)

No (0)

Prefer not to answer (-888)

Display This Question:  
If current\_treatment = Yes

**Q31 Treatment currently being received, select all that apply**

- Chemotherapy (1)
  - Radiation therapy (2)
  - Immunotherapy (e.g. Keytruda, Opdivo) (3)
  - Hormone therapy (4)
  - Targeted drug therapy (e.g. Avastin, Herseptin, Perjeta) (5)
  - Palliative care (6)
  - Other, please specify: (7)
- 
- Prefer not to answer (-888)

**Start of Block: Current Treatment Loop**

**For each selection in Q31 – Q32 appears**

Q32 How long have **you/they** been receiving  $\${Im://Field/1}$ ?

- Less than 1 week (1)
- 1-4 weeks (2)
- 5-12 weeks (3)
- 3-6 months (4)
- 7-12 months (5)
- More than 1 year (6)
- Prefer not to answer (-888)

**Start of Block: Previous treatment**

Q33 Besides any current treatment, have you/they ever had any of these cancer treatments?

Select all that apply

- Chemotherapy (1)
  - Radiation therapy (2)
  - Immunotherapy (e.g. Keytruda, Opdivo) (3)
  - Hormone therapy (4)
  - Targeted drug therapy (e.g. Avastin, Herseptin, Perjeta) (5)
  - Surgery (6)
  - Bone marrow/stem cell transplant (7)
  - Other, please specify (8)
- 
- None (9)
  - Prefer not to answer (-888)

**Start of Block: Previous Treatment Loop**  
**For each selection in Q33 – Q34 appears**

Q34 How long ago did you/they complete  $\${\text{Im://Field/1}}$ ?

- Less than 1 week (1)
- 1-4 weeks (2)
- 5-12 weeks (3)
- 3-6 months (4)
- 7-12 months (5)
- More than 1 year (6)
- Prefer not to answer (-888)

**Start of Block: Self health**

Q35 Do **you** currently have any medical illness?

Select all that apply

- Arthritis (1)
- Asthma (2)
- Back pain (3)
- Cancer (4)
- Cardiovascular disease (heart disease) (5)
- Chronic obstructive Pulmonary Disease (COPD) (6)
- Diabetes (7)
- Kidney disease (8)
- Mental health conditions (9)
- Osteoporosis (10)
- Other (11) \_\_\_\_\_
- I don't have any medical illnesses (0)
- Prefer not to answer (-888)

**Start of Block: Call info**

Q36 Select **ALL** the telephone information support services you have **EVER** used

- Cancer Council Victoria (131120) (1)
- Breast Cancer Network Australia (2)
- Prostate Cancer Foundation Australia (3)
- Carers Victoria/Australia (4)
- Other (5) \_\_\_\_\_

End of Block: Call info

---

**Start of Block: Call info Loop**  
**For each selection in Q36 – Q37-39 appears**

**Q37 How long ago did you last use  $\${Im://Field/1}$ ?**

- Less than 2 weeks ago (1)
- 2-4 weeks ago (2)
- 1-3 months ago (3)
- More** than **3** months but **less** than **6** months ago (4)
- More** than **6** but less than **9** months ago (5)
- 9 months ago or more (6)
- Don't recall (7)

**Q38 What was the reason for your most recent use of ?**

**Select all that apply**

- Financial or legal support (1)
  - Referral to other community organisations or non-government organisations (e.g. Prostate Cancer Foundation, GP etc) (2)
  - Questions/resources about cancer treatment (3)
  - Questions/resources about how to manage cancer (4)
  - Questions/resources about living with cancer (5)
  - Practical support (e.g. cleaning services, childcare, equipment etc) (6)
  - General support (7)
  - Counselling or emotional support (8)
  - Peer Support (e.g. Support groups, one on one phone based peer support) (9)
  - Transport (10)
  - Accommodation during treatment (11)
  - Wigs/Turbans (12)
  - Cancer Council led research (13)
  - Questions about early detection/screening - Tests and procedures (14)
  - Prevention or risk factors (15)
  - Other, please specify (16)
- 
- Prefer not to answer (-888)
-

Q39 In the last 12 months, how many times have you used  $\${lm://Field/1}$ ?

- 1 (1)
- 2 (2)
- 3-5 (3)
- 6-10 (4)
- More than 10 (5)
- Don't recall (6)

---

**Start of Block: Block 10**

Q40 Did you use the service on behalf of somebody that does not speak English?

- Yes (1)
- No (0)
- Prefer not to answer (-888)

---

**Start of Block: Optional Prize Draw & Future contact**

Q42 Would you like to enter the prize draw to win one of three \$100 Coles gift cards or a donation to a cancer organisation of your choice?

- Yes (1)
- No (0)

Q61 Would you like to receive a copy of the study results?

- Yes (1)
- No (0)

*Display This Question:*

*If prize draw = Yes*

*Or return\_findings = Yes*

Q44 Please provide your best email address to contact you on

---
